# Supplementary material
Source: PubMed Central journal article supplement (PMC2268789)

# I32C/N245C

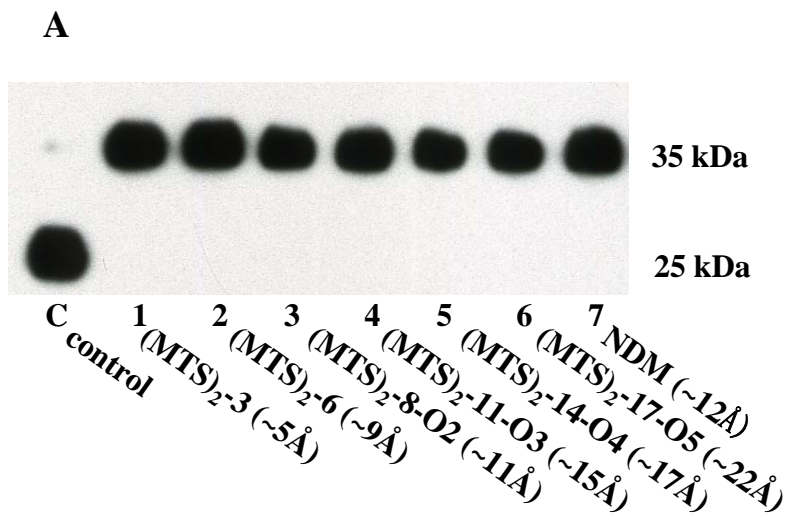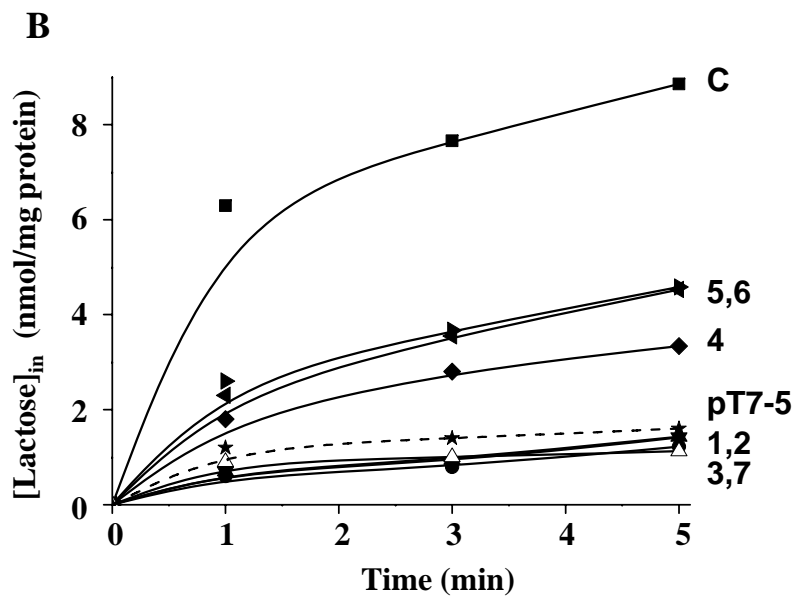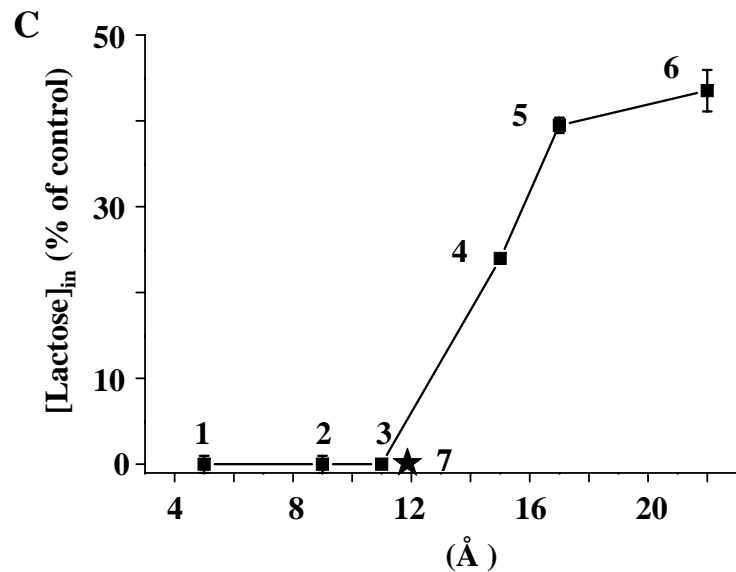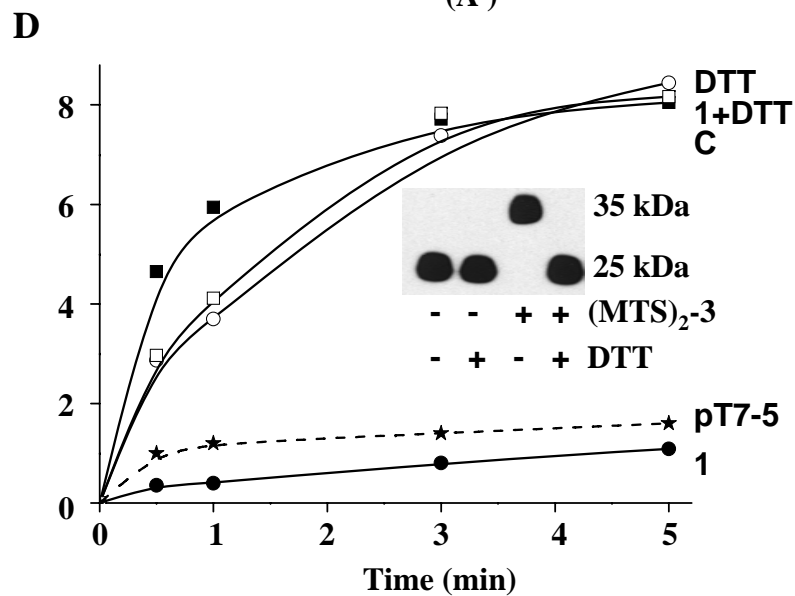

Supplement: pnas_0800825105_1.pdf [file pnas_0800825105_1.pdf]

# T45C/N245C

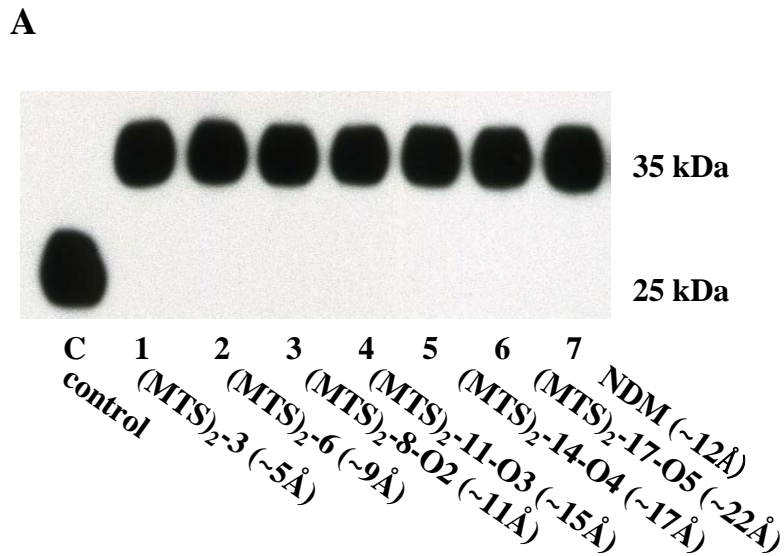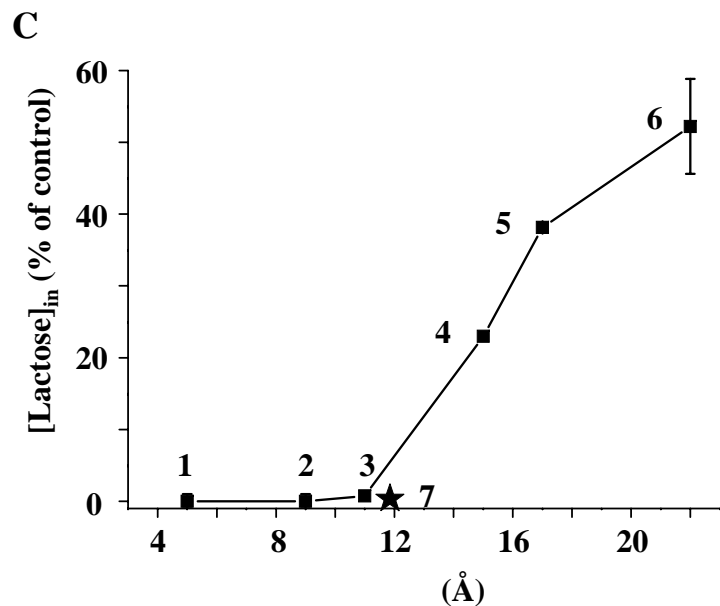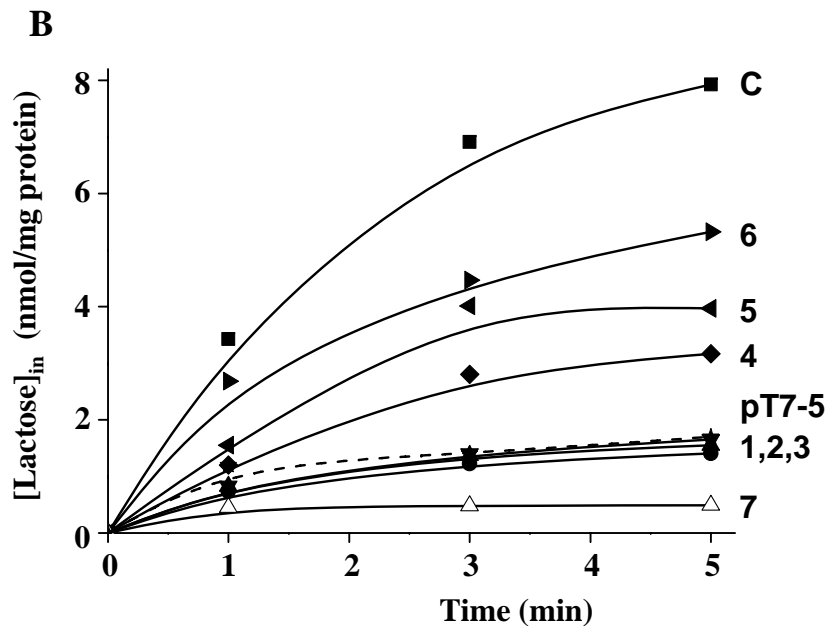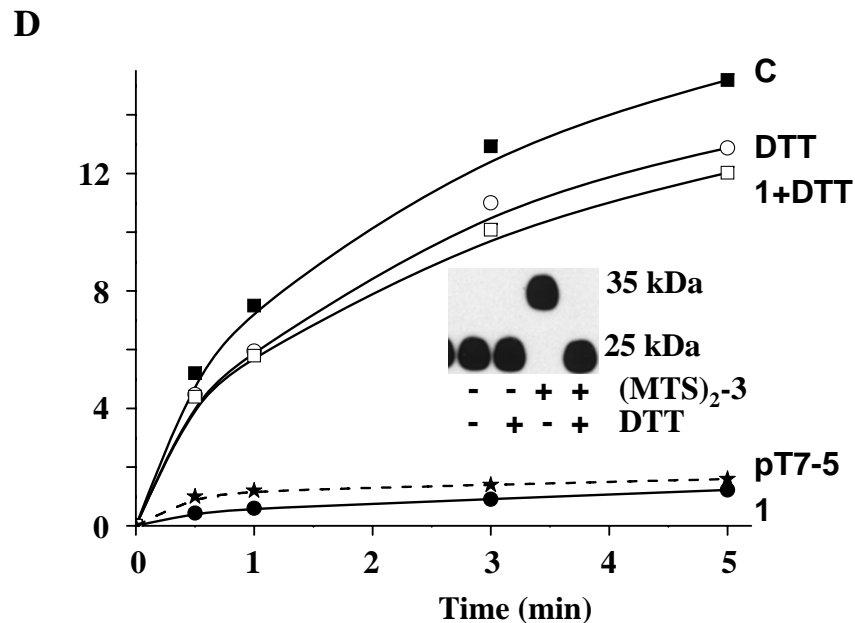

Supplement: pnas_0800825105_2.pdf [file pnas_0800825105_2.pdf]
